# Supplementary material for: Effects of Austenitizing Temperature on Tensile and Impact Properties of a Martensitic Stainless Steel Containing Metastable Retained Austenite
Source: MDPI journal article supplement (doi:10.3390/ma14041000), 2021-02-20
Supplement: s1 [file s1]

# Effects of Austenitizing Temperature on Tensile and Impact Properties of a Martensitic Stainless Steel Containing Metastable Retained Austenite

Biao Deng <sup>1</sup>, Dapeng Yang, Guodong Wang, Ziyong Hou and Hongliang Yi

The SADP and EDS are used to distinguish the  $M_{23}C_6$  and MC type carbides, as can be seen in Figure S1. The size of the  $M_{23}C_6$  carbides is much larger than MC, and the distinction can be used to distinguish the  $M_{23}C_6$  and MC in the SEM images.

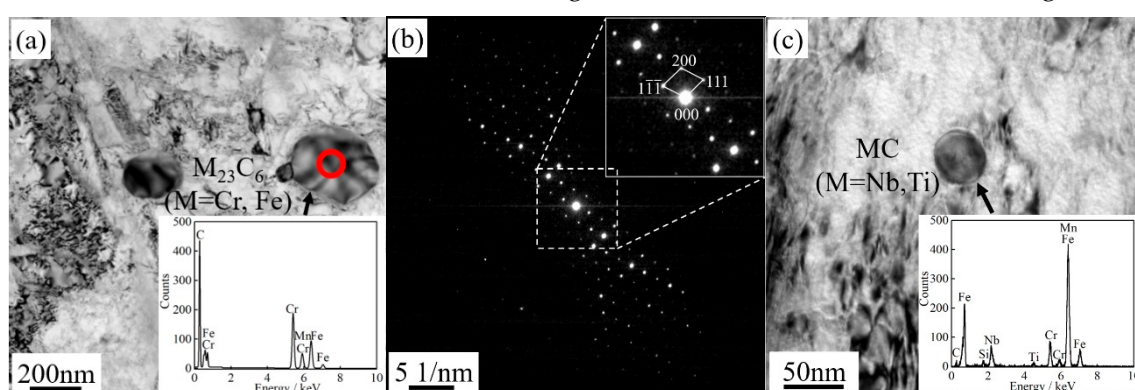

**Figure S1.** TEM images of (a)  $M_{23}C_6$  in 1020-Q; (b) diffraction patterns of  $M_{23}C_6$ ; (c) MC in 1060-Q, where the red annulus represents the selected area of diffraction pattern.

The mole fraction on alloy elements in  $M_{23}C_6$  is calculated by Thermo-Calc with the TCFE9 database, as can be seen in Figure S2. The atom ratio of chromium (Cr) and carbon (C) in  $M_{23}C_6$  at equilibrium state is approximately 49:20 in the 1000 °C–1040 °C range.

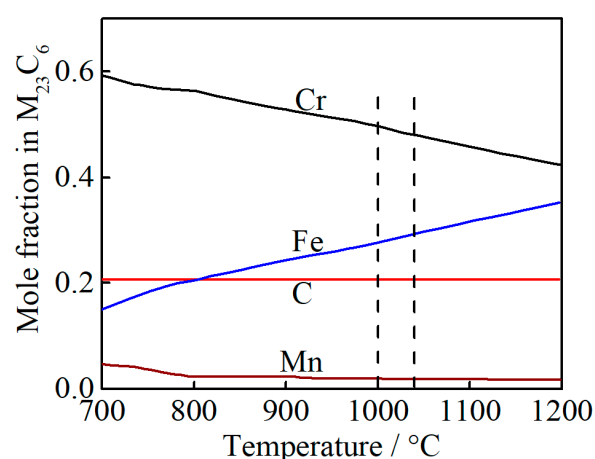

**Figure S2.** Mole fraction of the alloy elements in  $M_{23}C_6$ .
